# Supplementary material for: 5.2 Why is a national rabies database necessary
Source: HighWire-hosted journal article supplement (doi:10.1136/openhrt-2022-001971), 2014-12-03
Supplement: openhrt-2022-001971supp001_data_supplement.pdf [file openhrt-2022-001971supp001_data_supplement.pdf]

# Supplemental Material

**Hepatocyte growth factor is associated with greater risk of extra-coronary calcification: Results from the Multi-Ethnic Study of Atherosclerosis**

Table S1. Multivariable-adjusted association of HGF with AVC extent and progression stratified by sex

|                | Women                          |                            | Men                            |                               |
|----------------|--------------------------------|----------------------------|--------------------------------|-------------------------------|
|                | AVC extent                     | AVC progression            | AVC extent                     | AVC progression               |
|                | Percent difference<br>(95% CI) | Percent change<br>(95% CI) | Percent difference<br>(95% CI) | Percent change<br>(95% CI)    |
| HGF tertiles 1 | Reference                      | Reference                  | Reference                      | Reference                     |
| HGF tertiles 2 | 3 (-5, 12)                     | 3 (-1, 8)                  | -5 (-16, 7)                    | 3 (-2, 9)                     |
| HGF tertiles 3 | 9 (-1, 20)                     | 0 (-5, 6)                  | <b>30 (11, 51)<sup>b</sup></b> | <b>10 (2, 18)<sup>b</sup></b> |

Abbreviations: AVC, Aortic valve calcification; CI, Confidence interval; HGF, Hepatocyte growth factor. ECC extent at baseline and ECC progression at 2 years were derived from multivariable-adjusted linear mixed-effects models with robust variance estimation.

Percent difference and change were calculated from  $[\text{Exp}(\beta) - 1] \times 100$ .

The model was adjusted for age, sex, race/ethnicity, field center, education, physical activity, smoking, pack-years of smoking, BMI, health insurance, total cholesterol, HDL-C, use of lipid-lowering medication, systolic blood pressure, use of antihypertensive medication, diabetes and eGFR.

Significant interaction for AVC:  $P < 0.001$ .

Statistically significant results at: <sup>a</sup> $P < 0.001$ ; <sup>b</sup> $P < 0.01$ ; <sup>c</sup> $P < 0.05$ .

Table S2. Multivariable-adjusted association of HGF with MAC extent and progression stratified by race/ethnicity

|                | Extent                         | Progression                  | Extent                          | Progression                   |
|----------------|--------------------------------|------------------------------|---------------------------------|-------------------------------|
|                | Percent difference<br>(95% CI) | Percent change<br>(95% CI)   | Percent difference<br>(95% CI)  | Percent change<br>(95% CI)    |
|                | White                          |                              | Chinese-American                |                               |
| HGF tertiles 1 | Reference                      | Reference                    | Reference                       | Reference                     |
| HGF tertiles 2 | 8 (-4, 22)                     | <b>8 (0, 16)<sup>c</sup></b> | <b>-13 (-24, 0)<sup>c</sup></b> | -1 (-6, 4)                    |
| HGF tertiles 3 | <b>31 (12, 54)<sup>b</sup></b> | 8 (0, 18)                    | 21 (-8, 60)                     | <b>18 (0, 39)<sup>c</sup></b> |
|                | Black                          |                              | Hispanic                        |                               |
| HGF tertiles 1 | Reference                      | Reference                    | Reference                       | Reference                     |
| HGF tertiles 2 | -8 (-18, 3)                    | 3 (-3, 10)                   | 11 (-2, 27)                     | -7 (-15, 2)                   |
| HGF tertiles 3 | 6 (-8, 23)                     | <b>9 (0, 19)<sup>c</sup></b> | <b>27 (10, 47)<sup>b</sup></b>  | 7 (-4, 18)                    |

Abbreviations: MAC, Mitral annular calcification; CI, Confidence interval; HGF, Hepatocyte growth factor.

ECC extent at baseline and ECC progression at 2 years were derived from multivariable-adjusted linear mixed-effects models with robust variance estimation.

Percent difference and change were calculated from  $[\text{Exp}(\beta) - 1] \times 100$ .

The model was adjusted for age, sex, race/ethnicity, field center, education, physical activity, smoking, pack-years of smoking, BMI, health insurance, total cholesterol, HDL-C, use of lipid-lowering medication, systolic blood pressure, use of antihypertensive medication, diabetes and eGFR.

Significant interaction by race/ethnicity for MAC,  $P = 0.04$ .

Statistically significant results at: <sup>a</sup> $P < 0.001$ ; <sup>b</sup> $P < 0.01$ ; <sup>c</sup> $P < 0.05$ .

Table S3. Multivariable-adjusted association of HGF with DTAC extent and progression stratified by race/ethnicity

|                | Extent                         | Progression                   | Extent                         | Progression                |
|----------------|--------------------------------|-------------------------------|--------------------------------|----------------------------|
|                | Percent difference<br>(95% CI) | Percent change<br>(95% CI)    | Percent difference<br>(95% CI) | Percent change<br>(95% CI) |
|                | White                          |                               | Chinese-American               |                            |
| HGF tertiles 1 | Reference                      | Reference                     | Reference                      | Reference                  |
| HGF tertiles 2 | 8 (-11, 31)                    | 1 (-8, 12)                    | 1 (-30, 44)                    | -4 (-19, 13)               |
| HGF tertiles 3 | 18 (-7, 49)                    | <b>17 (5, 30)<sup>b</sup></b> | 38 (-17, 128)                  | 9 (-16, 42)                |
|                | Black                          |                               | Hispanic                       |                            |
| HGF tertiles 1 | Reference                      | Reference                     | Reference                      | Reference                  |
| HGF tertiles 2 | 12 (-8, 37)                    | 8 (-3, 21)                    | -4 (-25, 24)                   | 8 (-5, 23)                 |
| HGF tertiles 3 | <b>32 (4, 67)<sup>c</sup></b>  | <b>20 (6, 37)<sup>b</sup></b> | 10 (-17, 46)                   | 13 (-1, 29)                |

Abbreviations: CI, Confidence interval; DTAC, Descending thoracic aortic calcification; HGF, Hepatocyte growth factor.

ECC extent at baseline and ECC progression at 2 years were derived from multivariable-adjusted linear mixed-effects models with robust variance estimation.

Percent difference and change were calculated from  $[\text{Exp}(\beta) - 1] \times 100$ .

The model was adjusted for age, sex, race/ethnicity, field center, education, physical activity, smoking, pack-years of smoking, BMI, health insurance, total cholesterol, HDL-C, use of lipid-lowering medication, systolic blood pressure, use of antihypertensive medication, diabetes and eGFR.

Significant interaction by race/ethnicity for DTAC,  $P = 0.001$ .

Statistically significant results at: <sup>a</sup> $P < 0.001$ ; <sup>b</sup> $P < 0.01$ ; <sup>c</sup> $P < 0.05$ .
