# Supplementary figures and images for: 5.2 Why is a national rabies database necessary
Source: HighWire-hosted journal article supplement (doi:10.1136/openhrt-2022-001971), 2014-12-03

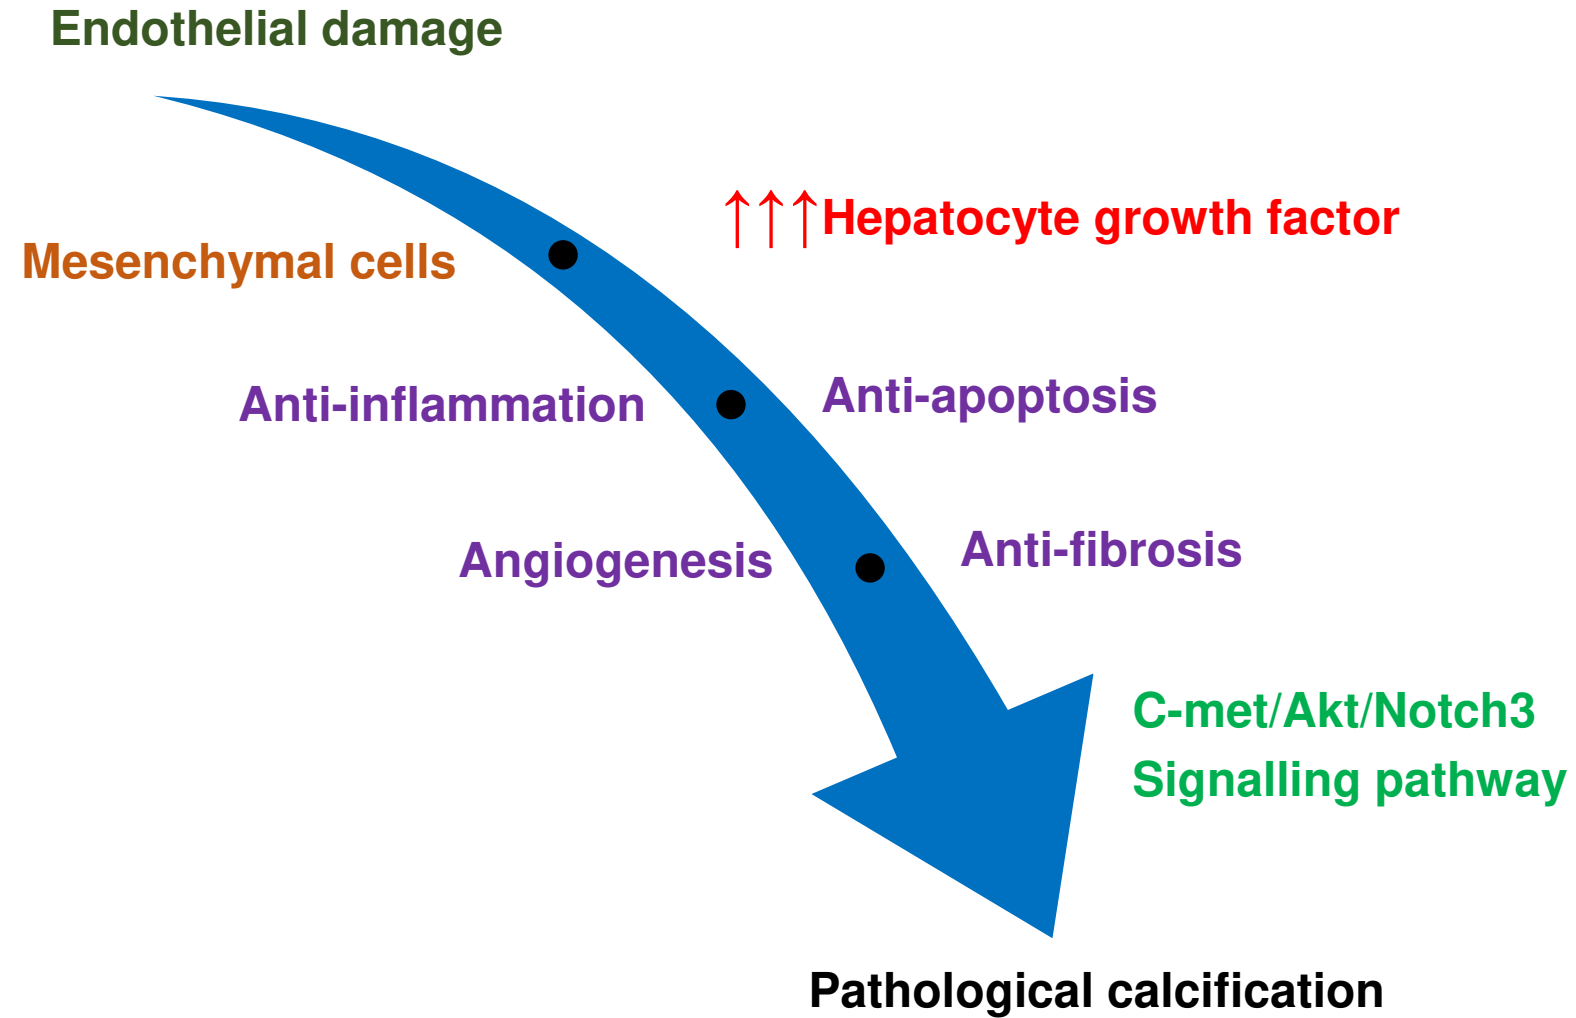

Supplement: openhrt-2022-001971supp002_data_supplement.pdf [file openhrt-2022-001971supp002_data_supplement.pdf]
